# Supplementary material for: Yeast Diversity in the Qaidam Basin Desert in China with the Description of Five New Yeast Species
Source: MDPI journal article supplement (doi:10.3390/jof8080858), 2022-08-16
Supplement: s1 [file s1]

A

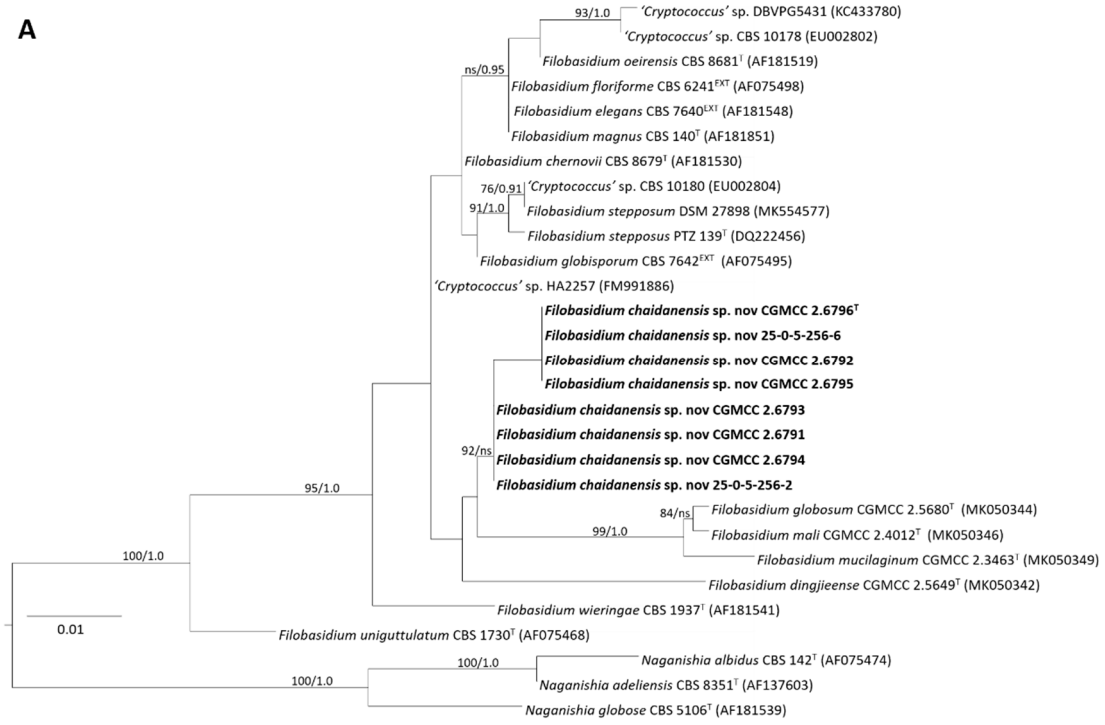

**B**

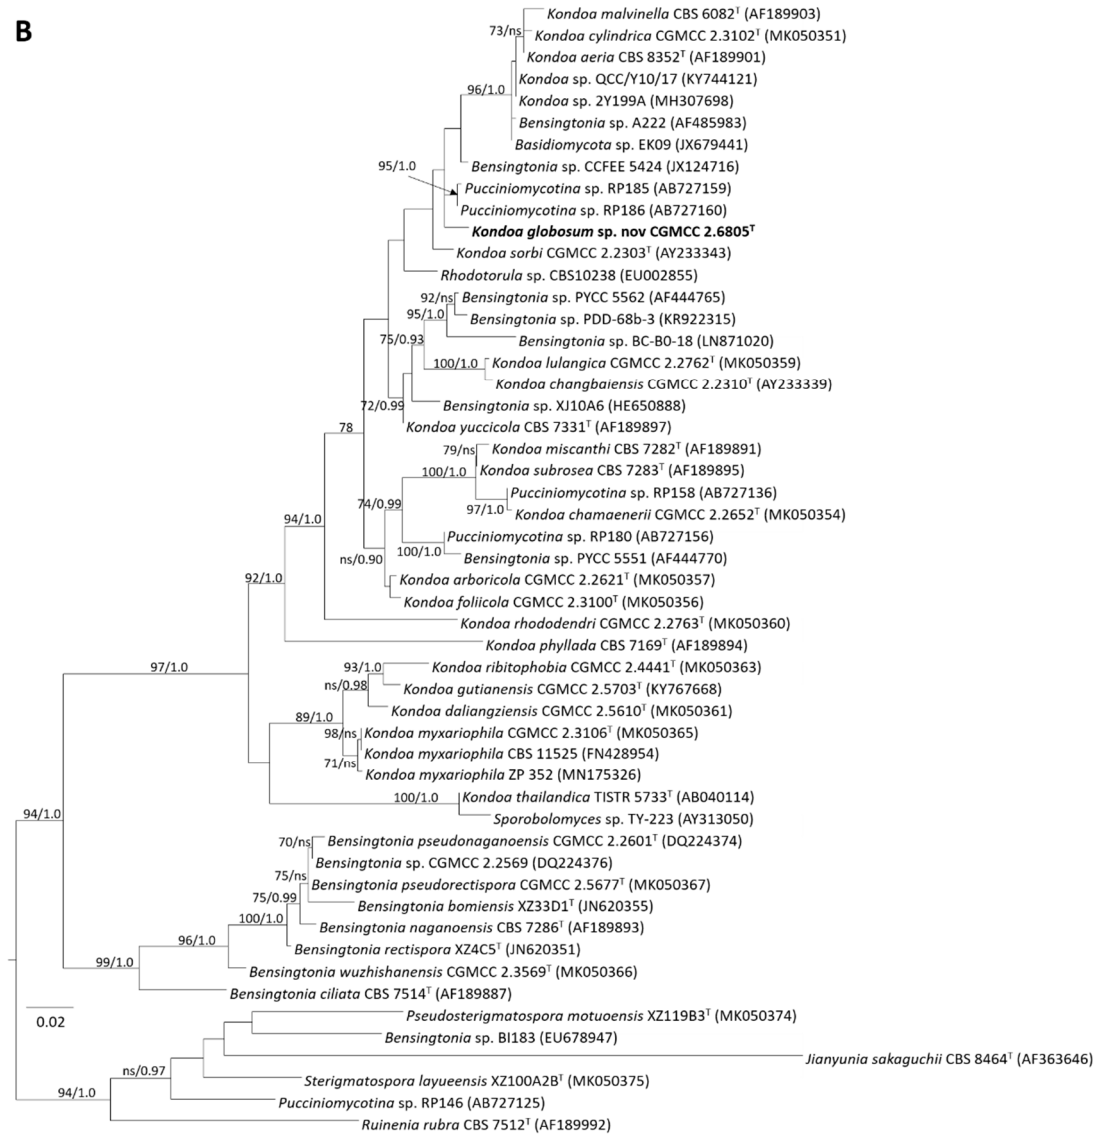

C

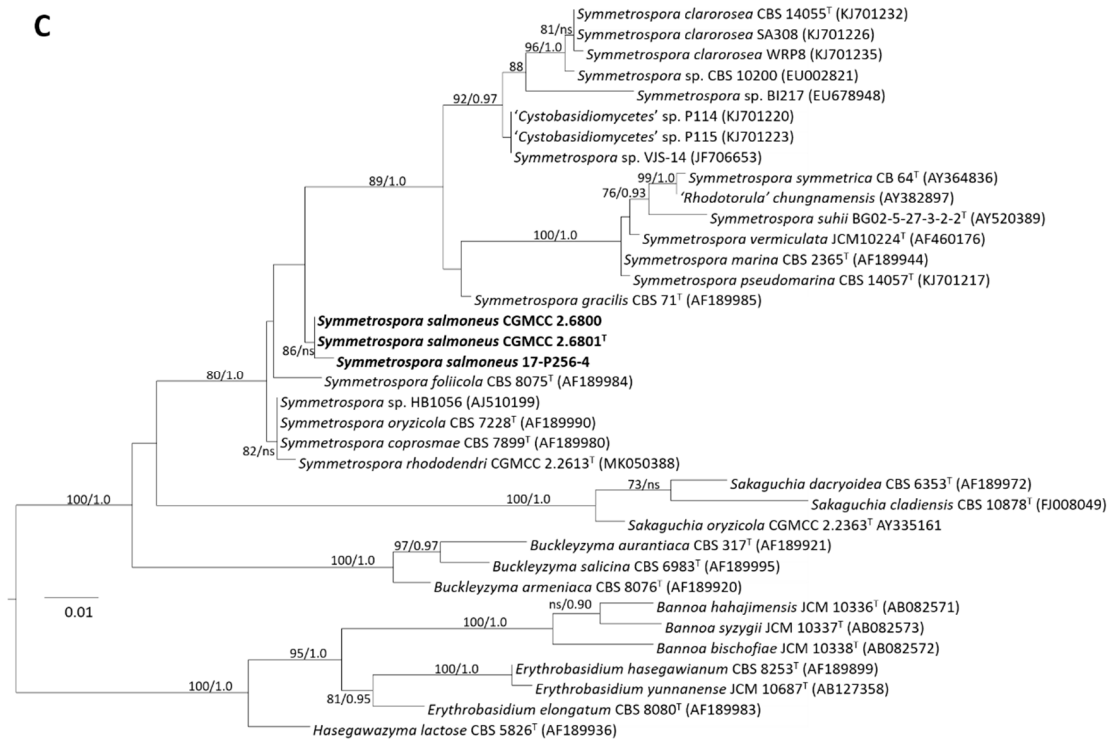

D

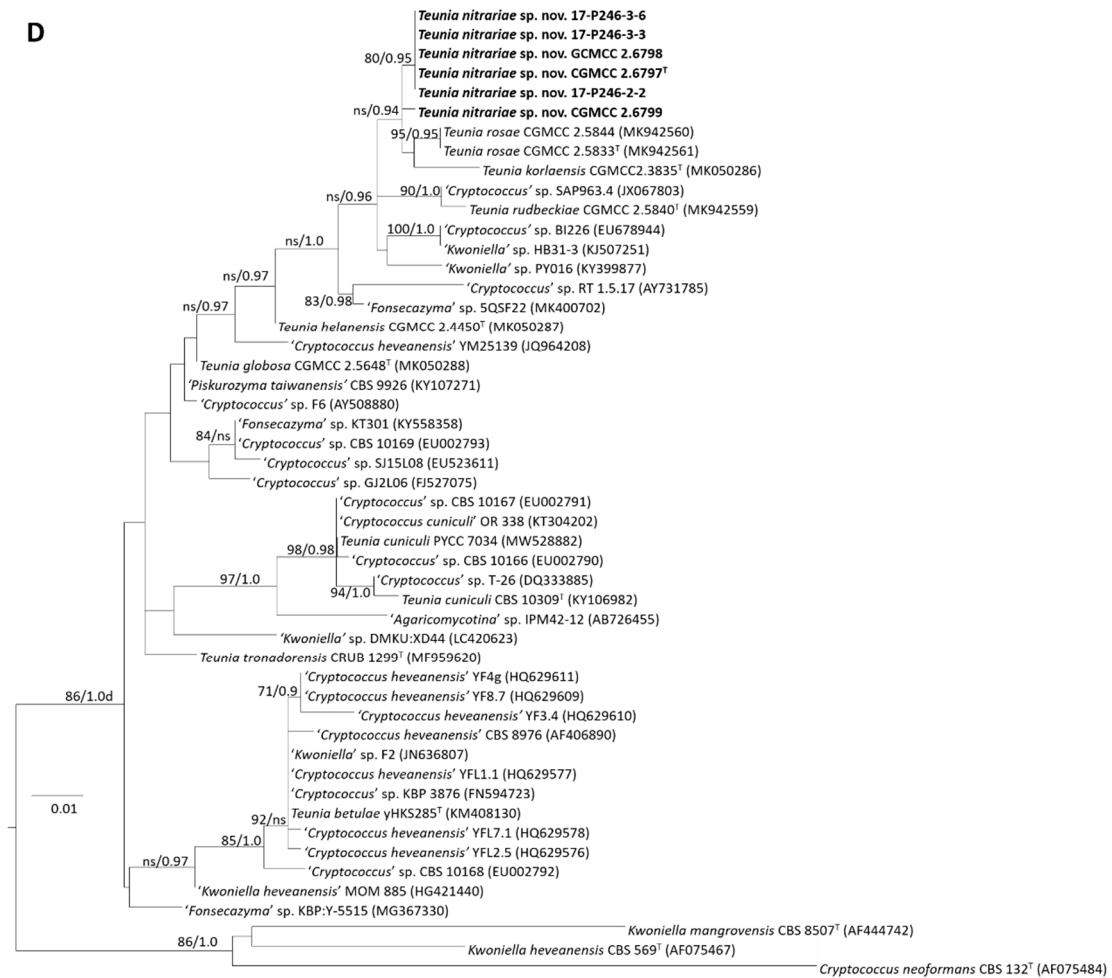

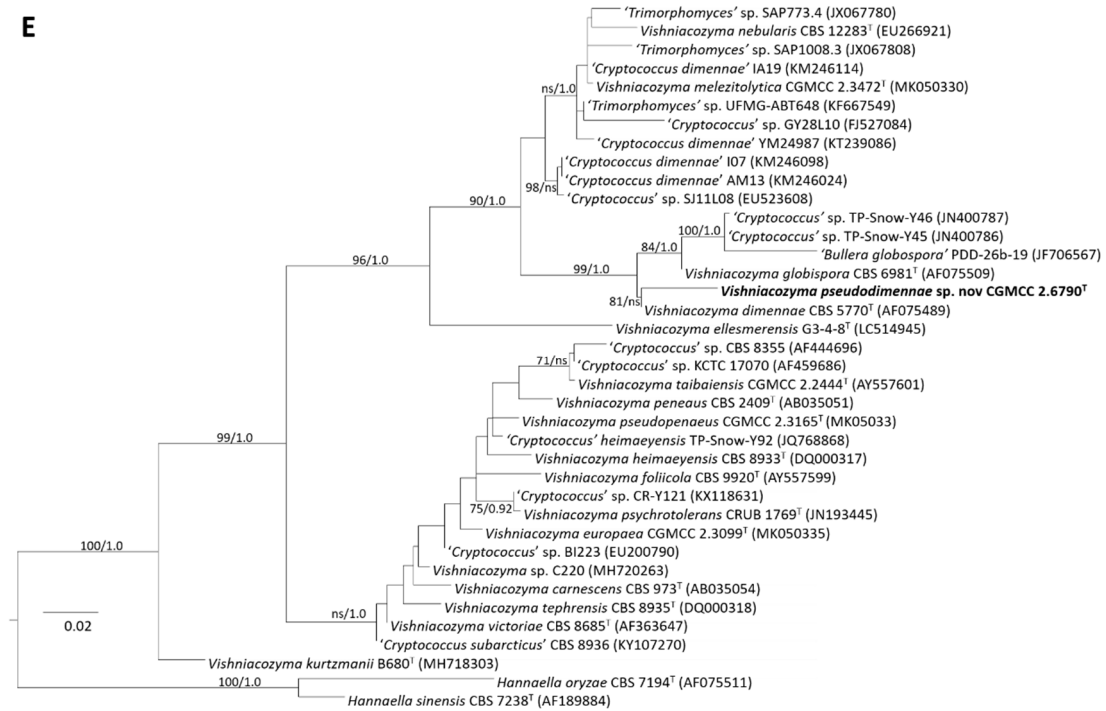

**Figure S1.** The Maximum likelihood tree of five new yeast species based on D1D2 sequence datasets: (A) *Filobasidium*; (B) *Kondoa*; (C) *Symmetrospora*; (D) *Teunia*; (E) *Vishniacozyma*. The tree backbone is constructed using RAxML and the numbers in each node represent bootstrap percentages (BP) of maximum likelihood from 1000 replicates and Bayesian posterior probabilities (PP). BP values  $\geq 70$  and PP values  $\geq 0.9$  were plotted on the branches of the tree. The clade of new species accepted in this study are in bold clades. Scale in 0.02 substitution per nucleotide position.

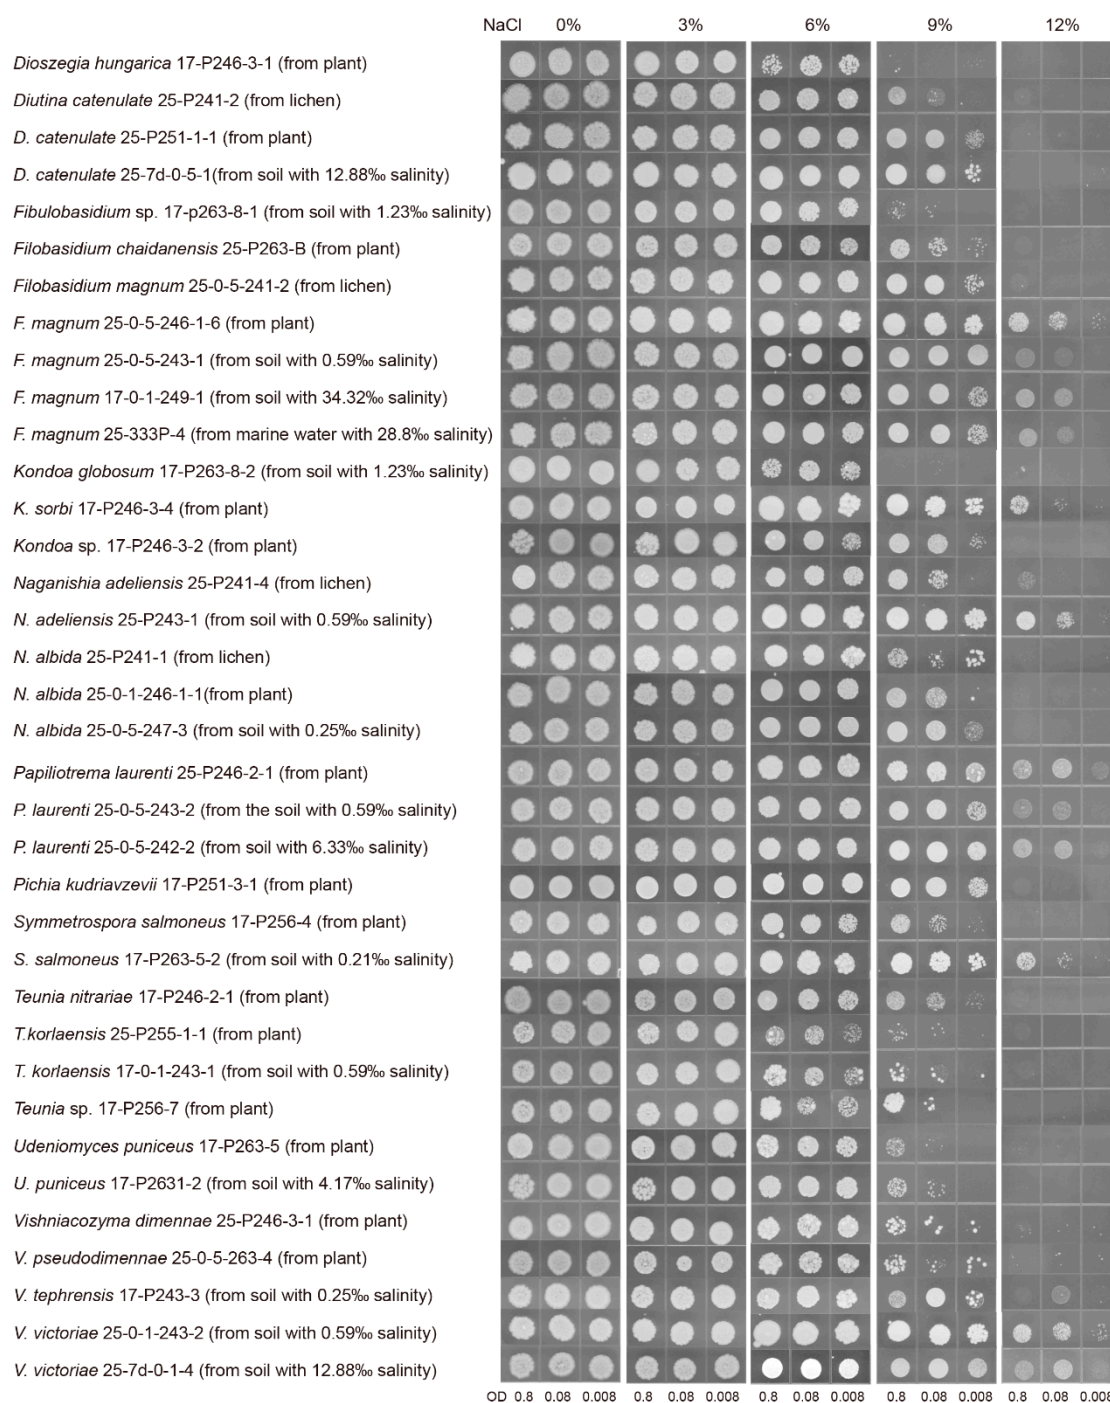

**Figure S2.** Growth of representative strains of all the species found in this study on YPD plates supplemented with 0%, 3%, 6%, 9%, and 12% (w/v) NaCl. All plates were incubated for 5 days at 20 °C.
