# Supplementary material for: Yeast Diversity in the Qaidam Basin Desert in China with the Description of Five New Yeast Species
Source: J Fungi (Basel). 2022 Aug 16;8(8):858. doi: 10.3390/jof8080858 (PMC9409814; doi:10.3390/jof8080858)
Supplement: Supplementary file 1 [file jof-08-00858-s001.zip › Supplementary files_Table S1-S4.xlsx]

## Sheet: Table S1
Table S1. GenBank accession numbers of taxa used in phylogenetic analyses
		GenBank Accession Numbers
Species name	Strain number	ITS	D1D2
Filobasidium
‘Cryptococcus’ sp.	DBVPG5431	-	KC433780
‘Cryptococcus’ sp.	CBS 10178	-	EU002802
‘Cryptococcus’ sp.	CBS 10180	-	EU002804
‘Cryptococcus’ sp.	HA2257	-	FM991886
Filobasidium chaidanensis sp. nov	CGMCC 2.6796T	OM417191	OM417191
Filobasidium chaidanensis sp. nov	CGMCC 2.6791	OM417198	OM417198
Filobasidium chaidanensis sp. nov	CGMCC 2.6792	OM417195	OM417195
Filobasidium chaidanensis sp. nov	CGMCC 2.6793	OM417197	OM417197
Filobasidium chaidanensis sp. nov	CGMCC 2.6794	OM417196	OM417196
Filobasidium chaidanensis sp. nov	CGMCC 2.6795	OM417192	OM417192
Filobasidium chaidanensis sp. nov	25-0-5-256-2	OM417194	OM417194
Filobasidium chaidanensis sp. nov	25-0-5-256-6	OM417193	OM417193
Filobasidium chernovii	CBS 8679	AF444354	AF181530
Filobasidium dingjieense	CGMCC 2.5649	MK050342	MK050342
Filobasidium elegans	CBS 7640	AF190006	AF181548
Filobasidium floriforme	CBS 6241	AF190007	AF075498
Filobasidium globisporum	CBS 7642	AF444336	AF075495
Filobasidium globosum	CGMCC 2.5680	MK050344	MK050344
Filobasidium magnus	CBS 140	AF190008	AF181851
Filobasidium mali	CGMCC 2.4012	MK050346	MK050346
Filobasidium mucilaginum	CGMCC 2.3463	MK050349	MK050349
Filobasidium oeirensis	CBS 8681	AF444349	AF181519
Filobasidium stepposum	DSM 27898	MK554577	MK554577
Filobasidium stepposus	PTZ 139	DQ222455	DQ222456
Filobasidium uniguttulatum	CBS 1730	AF444302	AF075468
Filobasidium wieringae	CBS 1937	AF444373	AF181541
Naganishia albidus	CBS 142	AF145321	AF075474
Naganishia adeliensis	CBS 8351	AF145328	AF137603
Naganishia globose	CBS 5106	AF444371	AF181539
Kondoa
Basidiomycota sp.	EK09	-	JX679441
Bensingtonia bomiensis	XZ33D1	JN620355	JN620355
Bensingtonia ciliata	CBS 7514	AF444563	AF189887
Bensingtonia naganoensis	CBS 7286	AF444558	AF189893
Bensingtonia pseudonaganoensis	CGMCC 2.2601	DQ224375	DQ224374
Bensingtonia pseudorectispora	CGMCC 2.5677	MK050367	MK050367
Bensingtonia rectispora	XZ4C5	JN620351	JN620351
Bensingtonia sp.	A222	-	AF485983
Bensingtonia sp.	CCFEE 5424	JX124727	JX124716
Bensingtonia sp.	PYCC 5562	AF444671	AF444765
Bensingtonia sp.	PDD-68b-3	-	KR922315
Bensingtonia sp.	BC-B0-18	-	LN871020
Bensingtonia sp.	XJ10A6	HE650880	HE650888
Bensingtonia sp.	PYCC 5551	AF444676	AF444770
Bensingtonia sp.	CGMCC 2.2569	-	DQ224376
Bensingtonia sp.	BI183	-	EU678947
Bensingtonia wuzhishanensis	CGMCC 2.3569	MK050366	MK050366
Jianyunia sakaguchii	CBS 8464	AF444626	AF363646
Kondoa aeria	CBS 8352	AF444562	AF189901
Kondoa arboricola	CGMCC 2.2621	MK050357	MK050357
Kondoa chamaenerii	CGMCC 2.2652	MK050354	MK050354
Kondoa changbaiensis	CGMCC 2.2310	AY233339	AY233339
Kondoa cylindrica	CGMCC 2.3102	MK050351	MK050351
Kondoa daliangziensis	CGMCC 2.5610	MK050361	MK050361
Kondoa foliicola	CGMCC 2.3100	MK050356	MK050356
Kondoa globosum sp. nov	CGMCC 2.6805	OM417190	OM417190
Kondoa gutianensis	CGMCC 2.5703	KY767668	KY767668
Kondoa lulangica	CGMCC 2.2762	MK050359	MK050359
Kondoa malvinella	CBS 6082	AF444498	AF189903
Kondoa miscanthi	CBS 7282	AF444516	AF189891
Kondoa myxariophila	CGMCC 2.3106	MK050365	MK050365
Kondoa myxariophila	CBS 11525	-	FN428954
Kondoa myxariophila	ZP 352	-	MN175326
Kondoa phyllada	CBS 7169	AF444514	AF189894
Kondoa rhododendri	CGMCC 2.2763	MK050360	MK050360
Kondoa ribitophobia	CGMCC 2.4441	MK050363	MK050363
Kondoa sorbi	CGMCC 2.2303	AY233343	AY233343
Kondoa sp.	QCC/Y10/17	-	KY744121
Kondoa sp.	2Y199A	MH304269	MH307698
Kondoa subrosea	CBS 7283	AF444565	AF189895
Kondoa thailandica	TISTR 5733	AB040114	EF384207
Kondoa yuccicola	CBS 7331	AF444518	AF189897
Pseudosterigmatospora motuoensis	XZ119B3	MK050374	MK050374
Pucciniomycotina sp.	RP146	-	AB727125
Pucciniomycotina sp.	RP185	-	AB727159
Pucciniomycotina sp.	RP186	-	AB727160
Pucciniomycotina sp.	RP158	-	AB727136
Pucciniomycotina sp.	RP180	-	AB727156
Rhodotorula sp.	CBS10238	-	EU002855
Ruinenia rubra	CBS 7512	-	AF189992
Sporobolomyces sp.	TY-223	AY313072	AY313050
Sterigmatospora layueensis	XZ100A2B	MK050375	MK050375
Symmetrospora
Bannoa bischofiae	JCM 10338	AB035721	AB082572
Bannoa hahajimensis	JCM 10336	AB035897	AB082571
Bannoa syzygii	JCM 10337	AB035720	AB082573
Buckleyzyma armeniaca	CBS 8076	AF444523	AF189920
Buckleyzyma aurantiaca	CBS 317	AF444538	AF189921
Buckleyzyma salicina	CBS 6983	AF444511	AF189995
‘Cystobasidiomycetes’ sp.	P114	KJ701219	KJ701220
‘Cystobasidiomycetes’ sp.	P115	KJ701222	KJ701223
Erythrobasidium elongatum	CBS 8080	AF444561	AF189983
Erythrobasidium hasegawianum	CBS 8253	AF444522	AF189899
Erythrobasidium yunnanense	JCM 10687	AB030353	AB127358
Hasegawazyma lactose	CBS 5826	AF444540	AF189936
‘Rhodotorula’ chungnamensis	-	-	AY382897
Sakaguchia cladiensis	CBS 10878	FJ008055	FJ008049
Sakaguchia dacryoidea	CBS 6353	AF444597	AF189972
Sakaguchia oryzicola	CGMCC 2.2363	AY335160	AY335161
Symmetrospora clarorosea	WRP 7	KJ701231	KJ701232
Symmetrospora clarorosea	SA308	-	KJ701226
Symmetrospora clarorosea	WRP8	-	KJ701235
Symmetrospora coprosmae	CBS 7899	AF444577	AF189980
Symmetrospora foliicola	CBS 8075	AF444521	AF189984
Symmetrospora gracilis	CBS 71	AF444578	AF189985
Symmetrospora marina	CBS 2365	AF444504	AF189944
Symmetrospora oryzicola	CBS 7228	AF444546	AF189990
Symmetrospora pseudomarina	CBS 14057	KJ701216	KJ701217
Symmetrospora rhododendri	CGMCC 2.2613	MK050388	MK050388
Symmetrospora salmoneus	CGMCC 2.6800	OM417186	OM417186
Symmetrospora salmoneus	CGMCC 2.6801	OM417187	OM417187
Symmetrospora salmoneus	17-P256-4	OM417188	OM417188
Symmetrospora sp.	CBS 10200	-	EU002821
Symmetrospora sp.	BI217	-	EU678948
Symmetrospora sp.	VJS-14	-	JF706653
Symmetrospora sp.	HB1056	-	AJ510199
Symmetrospora suhii	BG02-5-27-3-2-2	KJ701206	AY520389
Symmetrospora symmetrica	CB 64	AY364836	AY364836
Symmetrospora vermiculata	JCM10224	AB030335	AF460176
Teunia
‘Agaricomycotina’ sp.	IPM42-12	-	AB726455
‘Cryptococcus cuniculi’	OR 338	-	KT304202
‘Cryptococcus heveanensis’	YM25139	-	JQ964208
‘Cryptococcus heveanensis’	YF4g	-	HQ629611
‘Cryptococcus heveanensis’	YF8.7	-	HQ629609
‘Cryptococcus heveanensis’	YF3.4	-	HQ629610
‘Cryptococcus heveanensis’	YFL2.5	-	HQ629576
‘Cryptococcus heveanensis’	YFL1.1	-	HQ629577
‘Cryptococcus heveanensis’	YFL7.1	-	HQ629578
‘Cryptococcus heveanensis’	CBS 8976	-	AF406890
Cryptococcus neoformans	CBS 132	AF444326	AF075484
‘Cryptococcus’ sp.	BI226	-	EU678944
‘Cryptococcus’ sp.	SAP963.4	-	JX067803
‘Cryptococcus’ sp.	F6	AY518273	AY508880
‘Cryptococcus’ sp.	CBS 10169	-	EU002793
‘Cryptococcus’ sp.	SJ15L08	-	EU523611
‘Cryptococcus’ sp.	GJ2L06	-	FJ527075
‘Cryptococcus’ sp.	T-26	-	DQ333885
‘Cryptococcus’ sp.	CBS 10167	-	EU002791
‘Cryptococcus’ sp.	CBS 10166	-	EU002790
‘Cryptococcus’ sp.	KBP 3876	-	FN594723
‘Cryptococcus’ sp.	CBS 10168	-	EU002792
‘Cryptococcus’ sp.	RT 1.5.17	-	AY731785
‘Fonsecazyma’ sp.	21S4	-	MK942561
‘Fonsecazyma’ sp.	12A8	-	MK942560
‘Fonsecazyma’ sp.	5QSF22	MK400702	MK400702
‘Fonsecazyma’ sp.	KT301	KY558358	KY558358
‘Fonsecazyma’ sp.	KBP:Y-5515	-	MG367330
‘Kwoniella heveanensis’	MOM 885	-	HG421440
Kwoniella heveanensis	CBS 569	AF444301	AF075467
Kwoniella mangrovensis	CBS 8507	-	AF444742
‘Kwoniella’ sp.	HB31-3	-	KJ507251
‘Kwoniella’ sp.	PY016	KY399878	KY399877
‘Kwoniella’ sp.	F2	-	JN636807
‘Kwoniella’ sp.	DMKU:XD44	-	LC420623
‘Piskurozyma taiwanensis’	CBS 9926	KY102949	KY107271
Teunia betulae	yHKS285	KM384102	KM408130
Teunia cuniculi	CBS 10309	NR_137887	KY106982
Teunia cuniculi	PYCC 7034	-	MW528882
Teunia globosa	CGMCC 2.5648	MK050288	MK050288
Teunia helanensis	CGMCC 2.4450	MK050287	MK050287
Teunia korlaensis	CGMCC 2.3835	MK050286	MK050286
Teunia nitrariae sp. nov.	17-P246-2-2	OM417182	OM417182
Teunia nitrariae sp. nov.	GCMCC 2.6798	OM417185	OM417185
Teunia nitrariae sp. nov.	CGMCC 2.6797T	OM417183	OM417183
Teunia nitrariae sp. nov.	17-P246-3-3	-	OM914937
Teunia nitrariae sp. nov.	17-P246-3-6	-	OM914938
Teunia nitrariae sp. nov.	CGMCC 2.6799	OM417184	OM417184
Teunia tronadorensis	CRUB 1299	MF959620	MF959620
Vishniacozyma
‘Bullera globospora’	PDD-26b-19	-	JF706567
‘Cryptococcus dimennae’	IA19	-	KM246114
‘Cryptococcus dimennae’	YM24987	-	KT239086
‘Cryptococcus dimennae’	I07	-	KM246098
‘Cryptococcus dimennae’	AM13	-	KM246024
‘Cryptococcus’ heimaeyensis	TP-Snow-Y92	-	JQ768868
‘Cryptococcus’ sp.	GY28L10	-	FJ527084
‘Cryptococcus’ sp.	SJ11L08	-	EU523608
‘Cryptococcus’ sp.	TP-Snow-Y46	-	JN400787
‘Cryptococcus’ sp.	TP-Snow-Y45	-	JN400786
‘Cryptococcus’ sp.	CBS 8355	-	AF444696
‘Cryptococcus’ sp.	KCTC 17070	-	AF459686
‘Cryptococcus’ sp.	CR-Y121	-	KX118631
‘Cryptococcus’ sp.	BI223	-	EU200790
‘Cryptococcus subarcticus’	CBS 8936	-	KY107270
Hannaella oryzae	CBS 7194	AF444413	AF075511
Hannaella sinensis	CBS 7238	AF444468	AF189884
‘Trimorphomyces’ sp.	SAP773.4	-	JX067780
‘Trimorphomyces’ sp.	SAP1008.3	-	JX067808
‘Trimorphomyces’ sp.	UFMG-ABT648	-	KF667549
Vishniacozyma carnescens	CBS 973	KF036588	AB035054
Vishniacozyma dimennae	CBS 5770	AF410473	AF075489
Vishniacozyma ellesmerensis	G3-4-8	LC514945	LC514945
Vishniacozyma europaea	CGMCC 2.3099	MK050335	MK050335
Vishniacozyma foliicola	CBS 9920	KY105821	AY557599
Vishniacozyma globispora	CBS 6981	AF444407	AF075509
Vishniacozyma heimaeyensis	CBS 8933	KF036591	DQ000317
Vishniacozyma kurtzmanii	B680	MH718303	MH718303
Vishniacozyma melezitolytica	CGMCC 2.3472	MK050330	MK050330
Vishniacozyma nebularis	CBS 12283	-	EU266921
Vishniacozyma peneaus	CBS 2409	AB035047	AB035051
Vishniacozyma pseudodimennae sp. nov	CGMCC 2.6790T	OM417179	OM417179
Vishniacozyma pseudopenaeus	CGMCC 2.3165	MK050333	MK05033
Vishniacozyma psychrotolerans	CRUB 1769	NR_111656	JN193445
Vishniacozyma sp.	C220	-	MH720263
Vishniacozyma taibaiensis	CGMCC 2.2444	AY557601	AY557601
Vishniacozyma tephrensis	CBS 8935	DQ000318	DQ000318
Vishniacozyma victoriae	CBS 8685	AF444469	AF363647

## Sheet: Table S2
Table S2. Occurrence and distribution of yeast species and strains in different samples collected from the Qaidam Basin in Qinghai Province
Yeast species	Sample																Total number of strains	No. of yeast positive samples
	GPS2			GPS3		GPS6	GPS7	GPS8				GPS9	GPS10	GPS12	GPS13	GPS14
	241*	246*	247#	249#	251*	255*	254#	263*	263-1#	263-5#	263-8#	260#	256*	243#	264#	242#
Dioszegia hungarica		2															2	1
Diutina catenulata	1	1			1										8		11	3
Fibulobasidium sp.											1						1	1
Filobasidium magnum	1	8		1				3			1		1	1	1		17	8
Filobasidium chaidanensis sp. nov.								28					4				32	2
Kondoa sorbi		2															2	1
Kondoa globosum sp. nov.											1						1	1
Kondoa sp.		1															1	1
Naganishia adeliensis	6	6	1		3					1		1	2	3			23	8
Naganishia albida	5	7	3		27		1	9						1			53	7
Papiliotrema laurentii		5			1									2	1	3	12	5
Pichia kudriavzevii		1			5												6	2
Symmetrospora salmoneus sp. nov.										2			1				3	2
Teunia korlaensis						9								1			10	2
Teunia nitrariae sp. nov.		6															6	1
Teunia sp.								2					1				3	2
Udeniomyces puniceus								1	4				1				6	3
Vishniacozyma dimennae		1															1	1
Vishniacozyma pseudodimennae sp. nov.								1									1	1
Vishniacozyma tephrensis														1			1	1
Vishniacozyma victoriae														1	1		2	2
*Plant and lichen samples; #Soil samples

## Sheet: Table S3
Table S3. The number of yeast strains isolated from different samples incubated at 17oC and 25oC
Site	GPS2			GPS3		GPS6	GPS7	GPS8				GPS9	GPS10	GPS12	GPS13	GPS14	Total
# of sample	241*	246*	247#	249#	251*	255*	254#	263*	263-1#	263-5#	263-8#	260#	256*	243#	264#	242#
17oC	5	19	0	1	13	4	1	24	4	2	2	1	6	4	5	0	194
25oC	8	21	4	0	24	5	0	20	0	1	1	0	4	6	6	3
*Plant and lichen samples; #Soil samples

## Sheet: Table S4
Table S4. The number of yeast strains isolated from different samples using PDA, 1/2 PDA, and 1/10 PDA media
Site	GPS2			GPS3		GPS6	GPS7	GPS8				GPS9	GPS10	GPS12	GPS13	GPS14	Total
# of sample	241*	246*	247#	249#	251*	255*	254#	263*	263-1#	263-5#	263-8#	260#	256*	243#	264#	242#
1/10 PDA	2	5	1	1	9	0	0	3	0	0	0	1	0	3	6	0	194
1/2 PDA	5	14	3	0	8	1	0	21	0	1	1	0	4	2	5	3
PDA	6	21	0	0	20	8	1	20	4	2	2	0	6	5	0	0
*Plant samples; #Soil samples
